# Supplementary material for: Do Inequalities in Neighborhood Walkability Drive Disparities in Older Adults’ Outdoor Walking?
Source: PubMed Central journal article supplement (PMC5551178; doi:10.3390/ijerph14070740), 2017-07-07
Supplement: ijerph-14-00740-s001.pdf [file ijerph-14-00740-s001.pdf]

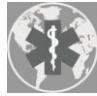

Article

# Do Inequalities in Neighbourhood Walkability Drive Disparities in Older Adults' Outdoor Walking?

Razieh Zandieh, Johannes Flacke, Javier Martinez, Phil Jones and Martin van Maarseveen

**Note S1.** Equation used for measuring land-use entropy score.

The following equation was used (where LMX = land-use mix score for a home-based neighbourhood,  $i$  = the land-use,  $p_i$  = the proportion of the land area devoted to a specific land-use against the sum of the area of the land-uses of interest,  $n$  = the number of land-use categories):

$$LMX = \left[ -1 \sum_{i=1}^n p_i^* \ln(p_i) \right] / \ln(n)$$

**Table S1:** Correlations between personal characteristics and objectively measured neighbourhood built environment attributes.

| Personal Characteristic | Residential Density | Land-Use Mix | Land-Use Intensity |              |               |                       |              |              |              | Street Connectivity | Retail Density |
|-------------------------|---------------------|--------------|--------------------|--------------|---------------|-----------------------|--------------|--------------|--------------|---------------------|----------------|
|                         |                     |              | Eating/Drinking    | Green Space  | Sport Complex | Social Infrastructure | Retail       | Schools      | Industries   |                     |                |
| Marital status          | 0.04                | -0.12        | 0.04               | 0.01         | 0.07          | 0.08                  | -0.01        | -0.02        | -0.03        | 0.04                | -0.04          |
|                         | <i>0.570</i>        | <i>0.116</i> | <i>0.570</i>       | <i>0.860</i> | <i>0.360</i>  | <i>0.304</i>          | <i>0.872</i> | <i>0.800</i> | <i>0.723</i> | <i>0.612</i>        | <i>0.594</i>   |
| Ethnicity               | -0.51               | -0.05        | -0.42              | 0.33         | 0.40          | -0.19                 | -0.41        | -0.46        | -0.52        | -0.25               | -0.51          |
|                         | <i>0.000</i>        | <i>0.480</i> | <i>0.000</i>       | <i>0.000</i> | <i>0.000</i>  | <i>0.011</i>          | <i>0.000</i> | <i>0.000</i> | <i>0.000</i> | <i>0.001</i>        | <i>0.000</i>   |

Note. This table shows Pearson correlation values;  $p$ -values are in *italic*.
